# Supplementary material
Source: publisher figshare collection journal article supplement (https://acs.figshare.com/ndownloader/files/5648511)
Supplement: Supplementary file 1 [file 5648511]

## Supporting Information (SI)

# **Direct Synthesis of Porous Polyurea Films by Vapor Deposition Polymerization in Ionic Liquid**

*Yuya Ohsawa, Rikuto Takahashi, Shingo Maruyama and Yuji Matsumoto\**

Department of Applied Chemistry, School of Engineering, Tohoku University, 6-6-07, Aramaki Aza  
Aoba Aobaku, Sendai, Miyagi 980-8579, Japan

\*E-mail: [matsumoto@atomol.che.tohoku.ac.jp](mailto:matsumoto@atomol.che.tohoku.ac.jp)

The supporting Information includes one scheme, one Table and four Figures.

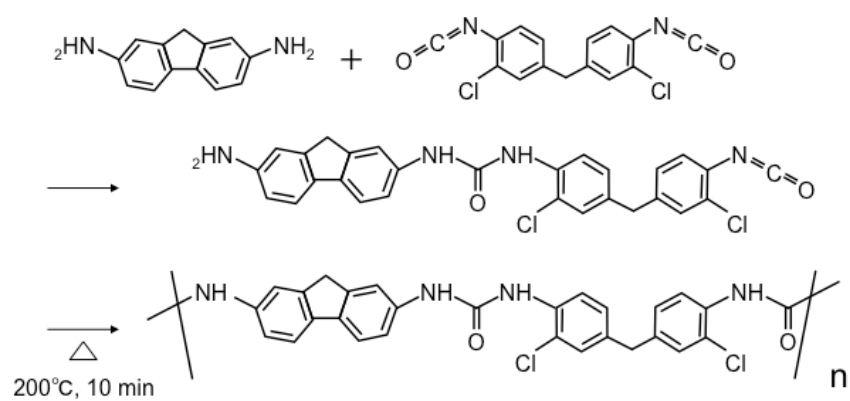

**Scheme S1:** Reaction of DAF and MBCI into PU.

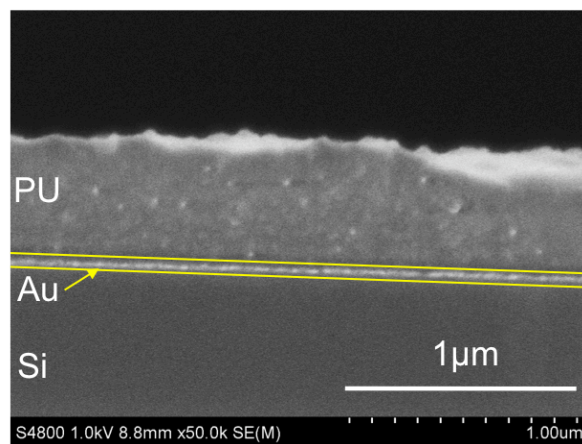

Figure S1: A cross-sectional SEM image of the porous film, whose thickness was determined to be about 530nm, thicker than the nominal thickness of 360nm due to the porosification, giving a volume fraction of voids to be 0.32.

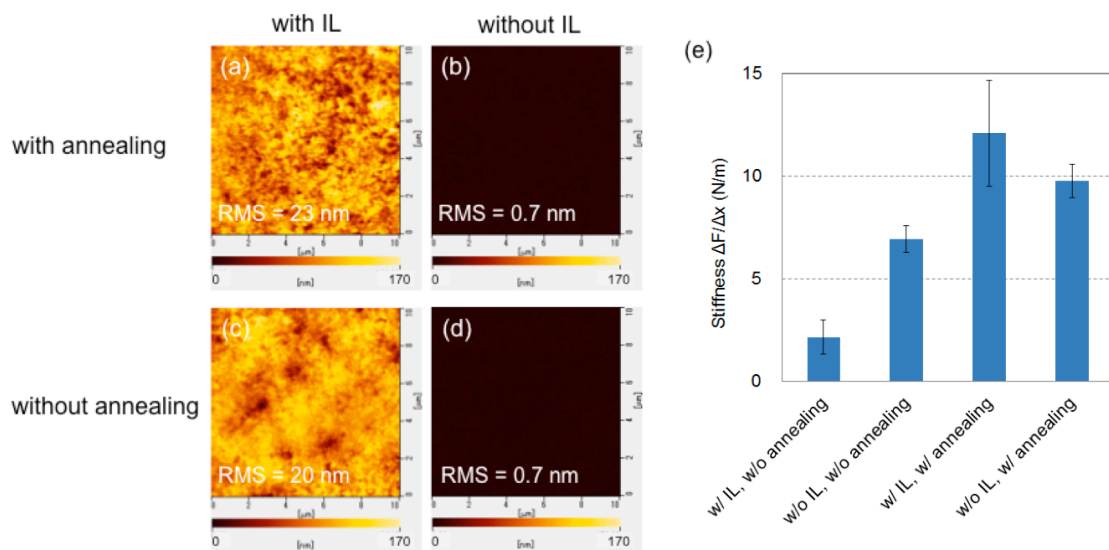

Figure S2: The average values of stiffness  $\Delta F / \Delta x$  (N/m) for each polyurea film, calculated from AFM force curves taken at 10 points randomly selected from the scan area (10 $\mu$ m $\times$ 10 $\mu$ m) are shown (e), together with the corresponding AFM images (a)-(d).

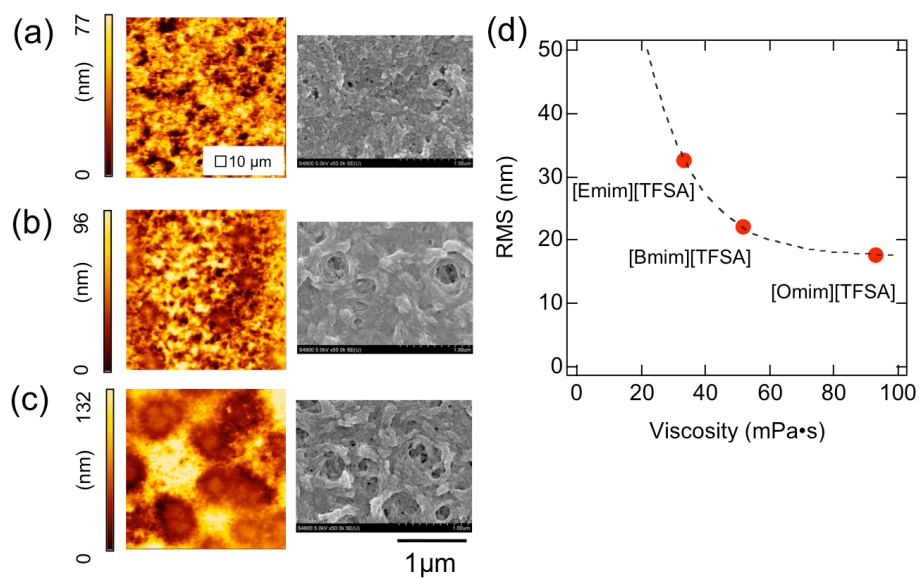

Figure S3: Network structures of polyurea films fabricated with three ILs with different viscosities of (a) [Omim][TFSA], (b) [Bmim][TFSA] and (c) [Emim][TFSA]. (d) The pore size (RMS roughness value) increases with a decrease of the viscosity of the IL.

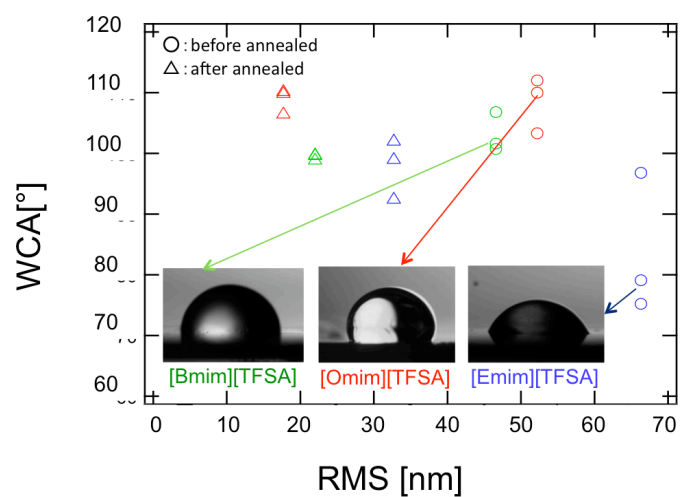

Figure S4: The plots of the CAs against the RMS values for various PU films prepared with different ILs.

**Table S1**

| Ionic liquid | WCA [degree]   |                 |
|--------------|----------------|-----------------|
|              | After annealed | Before annealed |
| [Omim][TFSA] | 108.8          | 108.5           |
| [Bmim][TFSA] | 99.4           | 103.0           |
| [Emim][TFSA] | 97.8           | 83.7            |
